# Supplementary material for: Classification related to immunogenic cell death predicts prognosis, immune microenvironment characteristics, and response to immunotherapy in lower-grade gliomas
Source: Front Immunol. 2023 Apr 19;14:1102094. doi: 10.3389/fimmu.2023.1102094 (PMC10154552; doi:10.3389/fimmu.2023.1102094)
Supplement: Supplementary file 2 [file Table_2.xlsx]

## Sheet: Sheet1
gene	lowMean	highMean	logFC	pvalue	fdr
AL354919.2	0.0899314	0.92044	3.35543	1.0386e-31	3.26139e-30
ICAM1	2.18975	6.46418	1.5617	2.16665e-34	8.32412e-33
PYDC1	0.507805	0.158782	-1.67722	1.95362e-11	8.84702e-11
SERPINB8	0.998104	2.35765	1.24009	1.45497e-37	7.22031e-36
AC009878.1	0.712826	0.312458	-1.18989	4.94204e-18	4.70877e-17
SHC3	17.77	8.53377	-1.05819	3.7105e-05	8.0716e-05
CHRM2	0.173599	0.0842169	-1.04358	5.80073e-12	2.81412e-11
PPARG	0.388339	0.80726	1.05572	1.18337e-19	1.31719e-18
PTPRN	13.425	5.99205	-1.1638	7.76102e-12	3.68262e-11
HLA-S	0.168648	0.374279	1.1501	5.08471e-07	1.40345e-06
MYZAP	0.18202	0.655921	1.84942	5.25095e-19	5.47917e-18
BATF2	1.43435	3.8116	1.41	8.22442e-22	1.05895e-20
SAPCD2	14.0848	6.86419	-1.03698	3.5791e-13	1.99659e-12
AL137140.1	0.202448	0.0580846	-1.80133	1.68014e-11	7.71117e-11
SERPINA1	1.94442	12.0013	2.62579	7.3183e-59	1.74322e-55
PTGFRN	6.58728	14.539	1.14217	9.84327e-13	5.26891e-12
CYCSP8	0.205341	0.0554243	-1.88943	2.2438e-17	1.9943e-16
ADAM19	1.24764	2.75815	1.14449	1.00452e-10	4.2275e-10
KCNK13	0.831299	2.30491	1.47127	4.04985e-37	1.96872e-35
MC4R	0.357263	0.147103	-1.28016	2.21765e-15	1.63543e-14
IGHV4-4	0.0412576	0.951929	4.52812	2.39822e-10	9.73179e-10
CXCL14	15.075	33.7682	1.16351	0.00896975	0.0137313
LRMDA	0.465861	0.956083	1.03724	6.7828e-35	2.69277e-33
CTF1	1.59029	3.56382	1.16413	3.30519e-18	3.20039e-17
DKK1	0.41394	3.05976	2.88592	0.00547484	0.00870566
CYTL1	3.72406	9.77609	1.39238	4.76541e-26	9.30428e-25
AC109439.1	1.78799	0.857931	-1.0594	7.27788e-14	4.51456e-13
AKAP5	1.58152	0.624991	-1.33941	3.80868e-15	2.7744e-14
AL354863.1	0.301836	0.0788618	-1.93637	4.04351e-20	4.6306e-19
AC124303.1	0.602115	0.269141	-1.16168	2.16006e-12	1.10177e-11
S100A3	1.34354	6.26451	2.22116	1.37821e-31	4.26351e-30
AC132153.1	0.149081	0.0600206	-1.31257	2.01275e-07	5.88268e-07
KCNH5	0.432016	0.119422	-1.85501	2.8293e-07	8.11975e-07
COL6A2	3.53106	21.3577	2.59658	2.21959e-26	4.55781e-25
RFPL1S	2.25469	0.71909	-1.64869	6.90808e-15	4.91195e-14
AC083855.2	0.185429	0.882242	2.25031	6.51364e-35	2.62974e-33
AGAP2-AS1	0.113523	0.783886	2.78766	8.20182e-15	5.72925e-14
LARS2-AS1	0.133322	0.0508779	-1.3898	2.5087e-05	5.56916e-05
AUXG01000058.1	33.5673	13.5826	-1.30529	3.97055e-27	8.83911e-26
THEMIS2	3.4797	8.52457	1.29266	1.03856e-34	4.05549e-33
AP001350.2	1.18486	2.58053	1.12295	7.27065e-15	5.10876e-14
AC009902.2	0.918875	1.89833	1.04679	2.01636e-06	5.1868e-06
CORO1A	8.92737	19.4595	1.12417	7.33599e-40	4.59851e-38
AC015819.1	0.128738	0.258945	1.00821	9.74856e-19	9.79792e-18
ECHDC2	1.0178	2.24725	1.1427	7.67723e-11	3.26557e-10
FCER1G	18.0168	60.9614	1.75855	3.50813e-53	1.5141e-50
HLA-DMA	8.08262	31.7278	1.97285	6.82483e-56	5.41892e-53
OR7E28P	0.169302	0.0388103	-2.12508	1.72124e-09	6.41625e-09
ZC3H12D	0.184333	0.459534	1.31786	7.97766e-39	4.41925e-37
LRRC2	0.696591	1.75182	1.33047	5.66435e-06	1.38101e-05
ESX1	0.220491	0.10836	-1.02489	7.65041e-09	2.62583e-08
PRDM8	3.58462	1.58792	-1.17468	1.1412e-18	1.14216e-17
CELF3	10.1684	4.1206	-1.30316	6.80648e-25	1.19214e-23
LCP2	1.82196	4.88101	1.42169	1.62585e-48	3.22731e-46
VSTM1	0.0484268	0.321197	2.72958	2.19902e-17	1.9692e-16
GDA	5.00253	1.81838	-1.46	6.53304e-05	0.000137714
SKINT1L	0.0867035	0.177194	1.03117	6.44496e-17	5.6234e-16
COL8A1	0.315337	2.48721	2.97956	7.04889e-21	8.65487e-20
ARPP21	7.2868	3.52934	-1.04589	2.70276e-26	5.45591e-25
AL390778.2	0.136658	0.034589	-1.98218	4.20729e-08	1.31865e-07
C1orf158	0.177287	1.2308	2.79544	1.17168e-11	5.4832e-11
NFKBIZ	0.65174	1.68506	1.37043	3.46594e-25	6.16109e-24
TRIP6	15.5232	33.535	1.11124	1.82626e-24	3.06349e-23
C3	37.5428	160.426	2.0953	3.0072e-51	1.02331e-48
CASP1	1.56645	5.80433	1.88963	4.81708e-58	5.73715e-55
SOCS2-AS1	0.337456	1.06786	1.66195	1.36427e-14	9.25837e-14
GGTLC4P	0.112183	0.27968	1.31793	5.36802e-12	2.62021e-11
CALN1	7.69776	3.80063	-1.0182	1.34266e-14	9.13776e-14
SWAP70	3.29174	7.13372	1.11581	3.20273e-32	1.04505e-30
EPHA8	0.272087	0.0527199	-2.36765	1.1136e-07	3.34502e-07
LHX6	0.969892	0.399876	-1.27827	0.00141241	0.00245933
CLEC2L	2.72819	0.829132	-1.71827	9.60249e-13	5.16323e-12
NSG2	74.549	26.4631	-1.49421	9.89029e-26	1.84052e-24
AL049775.1	0.207793	0.0820022	-1.34141	0.000423229	0.000793179
AC011995.2	0.205484	0.0833699	-1.30143	1.22284e-12	6.47291e-12
CNTF	0.635763	1.45371	1.19318	1.18123e-14	8.10859e-14
AC005790.1	0.160306	0.335413	1.06511	4.53828e-09	1.60866e-08
MAPK8IP2	25.4379	11.8011	-1.10806	3.39132e-30	9.50367e-29
IL18	2.7051	8.39102	1.63316	2.94588e-45	3.34147e-43
MSN	20.0922	64.6633	1.68631	2.75302e-40	1.82158e-38
LILRB2	0.461684	1.46976	1.6706	8.83028e-40	5.39326e-38
MYO5C	0.744692	1.56589	1.07226	0.0105988	0.0160498
TLX1NB	0.733801	0.249921	-1.55392	2.98256e-09	1.08797e-08
IL13RA2	1.36254	7.79057	2.51543	2.07154e-10	8.4495e-10
GFRA1	8.11352	3.51193	-1.20806	1.26761e-19	1.40439e-18
DACH2	1.97255	0.823854	-1.2596	3.78262e-18	3.63315e-17
SLC43A3	0.895811	2.65482	1.56735	2.62029e-27	5.88824e-26
ITPRIPL1	0.774192	1.61982	1.06507	4.30973e-22	5.73507e-21
SCN7A	0.587281	1.26547	1.10755	1.69229e-08	5.57542e-08
AC125616.1	0.530239	0.122847	-2.10978	2.13979e-17	1.92339e-16
IFI44L	5.3948	16.1172	1.57896	1.03633e-15	7.98881e-15
AC092819.3	1.15508	0.547316	-1.07755	1.89927e-11	8.61727e-11
ATP2B2	13.6838	6.61837	-1.04792	4.91536e-15	3.52662e-14
RPL34P33	0.32211	0.139174	-1.21067	1.53687e-11	7.08088e-11
TIFA	0.589106	1.40821	1.25727	8.75451e-41	6.13331e-39
MEPE	0.868353	0.259424	-1.74297	0.0068632	0.0107412
AC005753.2	0.372297	0.17664	-1.07564	4.98026e-15	3.56245e-14
TLR5	0.578761	1.3165	1.18566	9.69774e-29	2.53846e-27
PLAUR	0.984882	3.65451	1.89166	1.596e-41	1.18802e-39
AC080013.1	0.222524	0.110229	-1.01346	2.27915e-07	6.60454e-07
PRR36	12.9283	6.08673	-1.08679	1.6855e-30	4.89618e-29
PDE1A	3.39037	1.42082	-1.25472	1.31386e-13	7.84365e-13
BEST4	0.282888	0.643879	1.18656	5.33311e-07	1.46185e-06
ADGRE4P	0.279286	0.614774	1.13831	1.61662e-19	1.77456e-18
VWA3B	0.311834	0.647787	1.05474	9.20615e-05	0.000190687
IL10	0.0593576	0.247922	2.06238	1.02254e-28	2.64749e-27
AC139491.1	0.310679	0.0941243	-1.72279	2.54538e-09	9.3135e-09
AC108021.1	0.0790818	0.265243	1.7459	0.00213805	0.00364555
SBSPON	0.589287	1.44765	1.29667	0.000579509	0.00107007
LRG1	0.131497	0.3987	1.60028	9.17984e-33	3.12377e-31
TCF24	0.0768721	0.181448	1.23902	3.7048e-08	1.17196e-07
AL391845.2	1.01866	0.447774	-1.18583	1.05851e-13	6.40029e-13
CTXN3	0.883068	0.102946	-3.10064	1.43725e-12	7.55746e-12
CLECL1	0.159455	0.572838	1.84498	3.75162e-33	1.33378e-31
AC007036.1	0.0766332	0.182976	1.25561	4.10763e-08	1.29252e-07
TFEC	0.431741	1.29735	1.58733	3.32303e-41	2.39862e-39
OSR2	0.171146	0.486418	1.50697	7.77811e-19	7.85062e-18
HOXD9	0.819517	1.97881	1.27179	1.61826e-10	6.6922e-10
CLEC10A	0.15293	0.564846	1.88499	7.01373e-26	1.33654e-24
GAP43	98.255	201.216	1.03414	6.47569e-12	3.1099e-11
UBE2QL1	6.62399	2.56059	-1.37122	3.14168e-24	5.09081e-23
KYNU	0.0624673	0.234875	1.91072	3.81385e-53	1.5141e-50
FAM20A	0.292582	1.357	2.21351	3.28898e-39	1.91082e-37
AC093689.1	0.0701678	0.25846	1.88106	1.82045e-05	4.1377e-05
DPEP1	0.43143	2.04821	2.24716	5.49722e-14	3.47331e-13
HELZ2	1.94716	4.10638	1.07649	8.21074e-18	7.63984e-17
FN1	16.3133	50.4575	1.62902	1.19759e-21	1.53368e-20
AC010266.2	0.166909	0.0560779	-1.57356	2.20182e-07	6.40383e-07
CA3	0.588341	5.58078	3.24574	6.3899e-26	1.22748e-24
PITX2	0.0752287	0.248509	1.72394	0.000598575	0.00110101
AC124798.1	2.34523	1.05434	-1.15339	5.91478e-20	6.70905e-19
RASSF10-DT	0.0892536	0.341181	1.93455	6.44728e-10	2.49714e-09
GNLY	0.416212	2.09413	2.33096	1.67212e-32	5.53193e-31
AL035446.1	0.906272	3.6012	1.99046	2.65855e-14	1.72552e-13
HAVCR2	6.01104	17.7302	1.56052	7.88191e-46	1.04304e-43
ENG	10.9806	22.9762	1.06519	6.06223e-38	3.07239e-36
IRF5	2.31833	5.38167	1.21497	2.2739e-40	1.54755e-38
CLCF1	0.509395	3.13065	2.6196	4.96056e-35	2.07299e-33
CARTPT	2.36173	0.285719	-3.04718	4.44256e-05	9.6027e-05
CD72	0.3755	0.991485	1.40078	2.84773e-20	3.32515e-19
IGLV2-14	0.33227	3.57416	3.42718	4.16313e-16	3.35019e-15
PNMA6B	0.360423	0.152156	-1.24414	0.00561464	0.00890418
MMEL1	0.224558	0.750332	1.74044	2.51648e-23	3.7464e-22
PAX3	0.062381	0.232807	1.89995	2.23943e-07	6.49734e-07
STXBP6	3.08485	1.42232	-1.11695	3.22789e-21	4.04676e-20
OSCAR	1.24189	3.82775	1.62396	1.31909e-50	3.4912e-48
SLC17A7	35.3153	10.9111	-1.6945	2.82182e-10	1.13732e-09
EPN3	0.244318	0.0919118	-1.41044	3.42396e-08	1.08745e-07
AL392083.1	0.390443	0.176783	-1.14313	8.94178e-15	6.20994e-14
CLVS2	2.93971	0.956747	-1.61946	3.06311e-19	3.2719e-18
LINC00886	0.320121	0.747958	1.22434	2.45812e-12	1.24054e-11
HFE	0.48966	1.34871	1.46173	7.28883e-37	3.40431e-35
MEGF11	9.94594	4.70551	-1.07976	3.1736e-15	2.326e-14
BRINP1	17.4026	8.54279	-1.02653	2.02379e-16	1.67384e-15
TMEM150B	0.164979	0.456871	1.4695	4.88952e-22	6.47046e-21
SNCB	49.3077	13.9316	-1.82345	1.93634e-19	2.1061e-18
HECW1	1.50822	0.572209	-1.39823	3.42259e-21	4.24615e-20
BTK	1.44816	3.89366	1.42691	1.29356e-45	1.62171e-43
CFAP45	0.212888	1.46504	2.78278	1.73282e-14	1.14682e-13
AC015961.1	0.310413	0.115531	-1.42591	3.06764e-22	4.15177e-21
ANKRD34C	0.181693	0.0395757	-2.19882	5.9205e-10	2.30435e-09
MARVELD1	2.43187	5.40496	1.15222	5.40984e-26	1.04766e-24
OR52K3P	0.110305	0.509365	2.2072	5.19622e-44	4.95096e-42
EN1	0.345601	1.60615	2.21643	2.22862e-17	1.98823e-16
SCN2A	2.6642	1.09063	-1.28854	1.69684e-14	1.12902e-13
AC025171.3	0.122218	0.256141	1.06748	1.9583e-08	6.41633e-08
LINC01310	0.237479	0.115746	-1.03683	4.51013e-23	6.59087e-22
C7	0.720301	3.04805	2.08122	3.16377e-12	1.57002e-11
EGR4	0.830927	0.318166	-1.38494	1.63451e-05	3.74367e-05
RGS4	14.3204	4.35844	-1.71619	0.000110788	0.000227496
SLC15A3	2.27006	6.30243	1.47318	6.38374e-48	1.1697e-45
AC006581.2	0.241612	0.115933	-1.0594	6.16261e-12	2.97755e-11
CHI3L2	4.78435	37.4133	2.96716	9.27213e-45	1.00392e-42
RGS10	17.3614	36.3496	1.06606	6.62062e-28	1.60922e-26
AL035425.3	0.127192	0.058761	-1.11408	1.57863e-07	4.65959e-07
SVOP	7.13772	1.63946	-2.12225	8.05252e-26	1.52231e-24
HCLS1	7.24477	22.227	1.6173	1.54028e-45	1.83447e-43
TBX21	0.100275	0.266937	1.41254	3.42207e-21	4.24615e-20
OTOS	1.19496	4.78102	2.00035	1.99125e-09	7.35982e-09
GDF5	0.0926448	0.307049	1.72869	4.62718e-16	3.71109e-15
BACE2	0.950392	2.17157	1.19214	6.74427e-29	1.78498e-27
THBS1	1.00883	4.93537	2.29048	5.44307e-10	2.13598e-09
TOM1L1	0.335435	0.73326	1.12829	9.31051e-05	0.000192514
CKMT1A	1.49741	0.48756	-1.61881	6.16498e-27	1.34725e-25
EPHA10	1.4022	0.509903	-1.4594	7.0887e-24	1.13324e-22
TSPO	20.1077	41.5361	1.04662	8.2154e-31	2.44614e-29
TP73-AS1	1.14982	2.47284	1.10476	2.41809e-13	1.38792e-12
FAM242A	0.132049	0.0594846	-1.15048	2.59919e-07	7.50458e-07
CSMD1	1.85814	0.915563	-1.02113	1.24598e-17	1.13279e-16
ISG15	33.625	133.725	1.99167	1.45853e-23	2.24143e-22
TMEM271	2.8044	1.27191	-1.1407	1.77574e-16	1.47895e-15
CST6	0.128296	0.266875	1.05669	3.2159e-13	1.80667e-12
AC002546.1	0.836413	0.413151	-1.01755	2.28174e-05	5.09526e-05
SGMS2	0.214882	0.506971	1.23836	3.71216e-21	4.58154e-20
PDE6G	0.238525	0.626382	1.3929	9.90861e-42	7.86744e-40
AC110774.1	0.217167	0.0610713	-1.83024	1.86223e-22	2.59405e-21
AL161734.1	0.195591	0.0939551	-1.0578	2.50702e-08	8.1248e-08
SLC47A2	0.516506	2.36723	2.19634	5.33246e-19	5.52257e-18
LINC02607	0.360746	0.0894515	-2.01181	8.65476e-09	2.95353e-08
FNDC3B	1.3109	2.75644	1.07225	1.41164e-29	3.82105e-28
TESPA1	3.92215	0.578812	-2.76048	0.0265415	0.0371894
AC093627.7	0.731081	1.70229	1.21937	1.53404e-22	2.14946e-21
INSL5	0.0724686	0.199665	1.46216	2.72967e-11	1.2245e-10
HAMP	0.722839	5.32286	2.88046	3.50313e-43	2.98016e-41
NCR3LG1	1.42847	0.628566	-1.18434	5.23531e-16	4.17073e-15
SCRT2	2.0944	0.858436	-1.28676	2.79527e-16	2.28808e-15
IL32	2.10318	4.24818	1.01428	1.58781e-14	1.0624e-13
MTMR11	2.28441	4.73604	1.05186	1.5484e-24	2.65345e-23
CD6	0.133849	0.412193	1.62271	2.91015e-30	8.35178e-29
AC015908.5	0.193506	0.528148	1.44856	8.12883e-12	3.84948e-11
UNC79	4.96526	1.89659	-1.38846	1.60942e-24	2.73831e-23
BEX5	15.095	7.02984	-1.10251	0.000566522	0.00104771
IFIH1	2.11955	5.24971	1.30848	1.04058e-31	3.26139e-30
AC025171.5	0.27027	0.870504	1.68745	4.79097e-13	2.64782e-12
GLRX	2.16376	4.48817	1.05258	1.24333e-41	9.55356e-40
IL1RAP	1.50711	4.20758	1.48121	1.70402e-15	1.2724e-14
UCP2	10.3289	28.1226	1.44504	1.36812e-38	7.08448e-37
S100A6	132.686	403.564	1.60478	3.85965e-34	1.43651e-32
CD37	3.36035	8.99891	1.42114	5.94101e-39	3.3694e-37
IL27	0.0804692	0.210629	1.3882	1.6272e-24	2.74892e-23
XKR8	0.891836	2.19105	1.29677	3.04423e-20	3.53725e-19
AC096921.2	0.106612	0.226015	1.08405	4.76556e-33	1.66935e-31
FGFBP2	0.830041	2.18394	1.39568	2.74491e-13	1.55676e-12
CSF3R	1.92376	4.62171	1.26449	6.6244e-37	3.15586e-35
GNG3	5.28145	2.52708	-1.06347	9.88372e-06	2.32639e-05
AP003071.4	0.135512	0.398434	1.55592	7.21642e-14	4.48813e-13
HLA-DMB	2.8837	11.4507	1.98944	3.92483e-55	2.33724e-52
ATP6V1G2	42.2032	19.9407	-1.08164	1.31651e-29	3.60452e-28
GPR21	0.43808	0.154477	-1.5038	1.09232e-16	9.25946e-16
KCNMB1	0.918632	1.86148	1.01889	5.50112e-20	6.2697e-19
CCDC200	0.165047	0.333826	1.01622	6.21014e-28	1.52501e-26
ARPP19P1	0.16577	0.0770654	-1.10503	1.43544e-07	4.26337e-07
SRRM3	5.89834	2.87664	-1.03592	1.86447e-17	1.68866e-16
CCN1	12.2609	26.926	1.13493	2.01868e-13	1.18436e-12
KLHL1	0.157284	0.0539125	-1.54468	5.35458e-08	1.66292e-07
C1QA	65.8784	244.603	1.89257	2.13231e-46	3.17447e-44
RASD2	4.76042	2.08875	-1.18845	1.62966e-10	6.72763e-10
AC090559.1	1.8947	4.51656	1.25326	2.3385e-33	8.43987e-32
SLN	3.1807	19.0279	2.5807	3.65515e-10	1.45838e-09
GSDMA	0.178144	0.519068	1.54288	5.02537e-11	2.2045e-10
CMTM7	1.23884	3.11009	1.32797	3.47025e-43	2.98016e-41
STING1	2.76716	5.88417	1.08843	6.86786e-43	5.64112e-41
Z98745.2	0.0749504	0.172922	1.20611	0.0214305	0.0306407
RNU7-160P	0.197972	0.437621	1.14439	0.000130594	0.000264744
AP002840.2	0.190924	0.536533	1.49067	9.74203e-17	8.34731e-16
TMC8	1.31727	3.03084	1.20216	1.71941e-36	7.87624e-35
SLC17A8	2.90322	0.435185	-2.73795	7.2716e-13	3.9636e-12
GRASLND	0.364943	0.134251	-1.44273	1.3705e-05	3.16638e-05
GRM5	1.01661	0.41475	-1.29345	4.62946e-11	2.03834e-10
JAKMIP1	0.312253	0.155132	-1.00922	3.64716e-10	1.45764e-09
AC008761.3	0.302734	0.144256	-1.06942	3.17084e-13	1.78557e-12
KCNJ5	1.11953	2.61464	1.22372	1.22233e-26	2.59964e-25
TRIM21	4.43561	9.35834	1.07712	9.70881e-39	5.256e-37
GATA3	0.0870426	0.274265	1.65577	4.4589e-26	8.77777e-25
RN7SL138P	1.07646	2.33399	1.1165	1.45782e-31	4.45195e-30
CD248	1.93207	6.59554	1.77134	1.8884e-20	2.22681e-19
SERPINB1	4.30231	11.1586	1.37498	3.01754e-50	7.18778e-48
SLC44A3-AS1	0.269224	0.721379	1.42195	2.3262e-27	5.27716e-26
WSCD2	2.27281	0.594385	-1.93501	1.26638e-22	1.78493e-21
TLR6	0.500377	1.28245	1.35781	2.39132e-35	1.03566e-33
CRYM	7.55754	2.20846	-1.77488	3.19824e-09	1.16308e-08
AL390755.2	0.12178	0.370918	1.60682	7.83293e-21	9.56823e-20
OASL	0.455695	2.63915	2.53394	9.56309e-32	3.07828e-30
APLNR	36.0862	89.355	1.3081	3.65201e-13	2.02776e-12
AL133387.1	0.147094	0.0646007	-1.18711	0.00618443	0.0097623
AC015818.5	0.127265	0.0625713	-1.02427	9.13029e-08	2.77403e-07
AC093849.2	0.105716	0.342452	1.6957	0.000706819	0.00128424
WNT7B	6.78086	2.83577	-1.25773	7.3037e-23	1.03556e-21
TFPI2	0.131242	0.584365	2.15464	1.02397e-12	5.46884e-12
AL645768.1	0.232911	0.0885074	-1.39591	0.000169515	0.000337049
LHX5	2.01884	0.495297	-2.02716	1.58966e-15	1.19828e-14
PTPRC	1.50604	5.63865	1.90459	5.04184e-44	4.95096e-42
NSUN7	0.107812	0.484257	2.16726	2.40383e-22	3.30978e-21
NRXN3	2.38415	1.10347	-1.11142	1.36924e-10	5.72196e-10
GBP1	3.13806	19.9154	2.66594	1.49862e-46	2.37981e-44
SIT1	0.0628885	0.464257	2.88405	1.08659e-46	1.84875e-44
PI15	0.216304	0.433789	1.00393	1.19331e-09	4.49756e-09
GSX2	0.355719	0.967051	1.44286	1.01966e-06	2.7168e-06
MARCO	0.314547	1.9741	2.64984	5.40693e-05	0.000115717
CD3E	0.189261	1.3479	2.83226	2.95866e-46	4.1456e-44
TENT5B	0.437805	1.61339	1.88173	5.27935e-16	4.1918e-15
OLFM1	42.7924	19.5483	-1.13031	3.83713e-19	4.06224e-18
REPS2	5.94055	2.86957	-1.04976	5.92735e-22	7.75766e-21
CD163	2.82978	22.3791	2.98339	9.87803e-30	2.73598e-28
CD58	1.97674	5.46111	1.46607	1.25158e-38	6.62502e-37
CASP8	0.583583	1.56379	1.42204	5.98989e-51	1.78349e-48
SIX2	0.17144	0.356124	1.05467	8.73845e-10	3.34646e-09
AL513217.1	1.05496	0.411158	-1.35942	7.70121e-19	7.80608e-18
NFAM1	1.12987	3.50033	1.63133	6.32923e-49	1.37057e-46
AP001267.2	0.275779	0.135137	-1.02909	6.29122e-22	8.18889e-21
DOCK2	1.23748	3.35449	1.43869	1.55934e-39	9.28588e-38
AC080038.1	0.769428	1.58895	1.04621	6.42632e-14	4.03892e-13
SKAP2	3.70397	8.99644	1.28028	1.30575e-28	3.34441e-27
SFRP4	2.42761	10.6078	2.12752	1.31712e-24	2.29005e-23
ADAMTS18	0.131115	0.307546	1.22997	3.84469e-06	9.54957e-06
KRT17	0.972308	0.365804	-1.41034	3.80848e-07	1.06853e-06
MADCAM1	1.20393	0.593225	-1.0211	5.49882e-13	3.01801e-12
HOTAIR	0.0816777	0.358714	2.13482	1.84122e-13	1.08291e-12
ABCG4	0.770397	0.329531	-1.22519	3.26333e-07	9.27595e-07
SNAI1	0.521956	1.47185	1.49563	7.33688e-11	3.1376e-10
GFOD1-AS1	0.21757	0.0882618	-1.30162	1.19521e-15	9.15429e-15
WAS	5.09797	11.9902	1.23386	7.2699e-40	4.59851e-38
AQP9	0.216436	0.614871	1.50635	5.387e-06	1.3162e-05
AC010624.1	0.273092	0.686381	1.32962	1.253e-06	3.30161e-06
IQSEC3	4.98273	1.29577	-1.94313	3.25815e-22	4.3847e-21
APOL2	15.1653	32.2084	1.08666	8.43934e-26	1.58287e-24
IL2RG	0.130346	0.551079	2.07992	3.45909e-44	3.58241e-42
